# Supplementary material
Source: PubMed Central journal article supplement (PMC10233738)
Supplement: PEDS_2022059393SupplementaryData.pdf [file PEDS_2022059393SupplementaryData.pdf]

## Supplemental Information

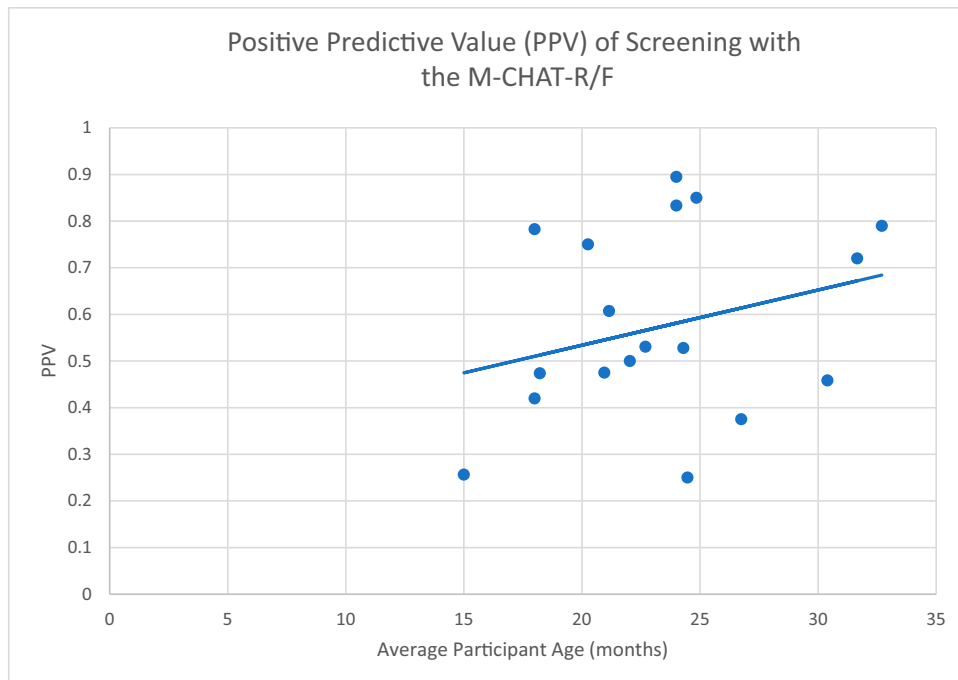

### SUPPLEMENTAL FIGURE 5

Meta-regression graph of age against positive predictive value of M-CHAT-R/F.

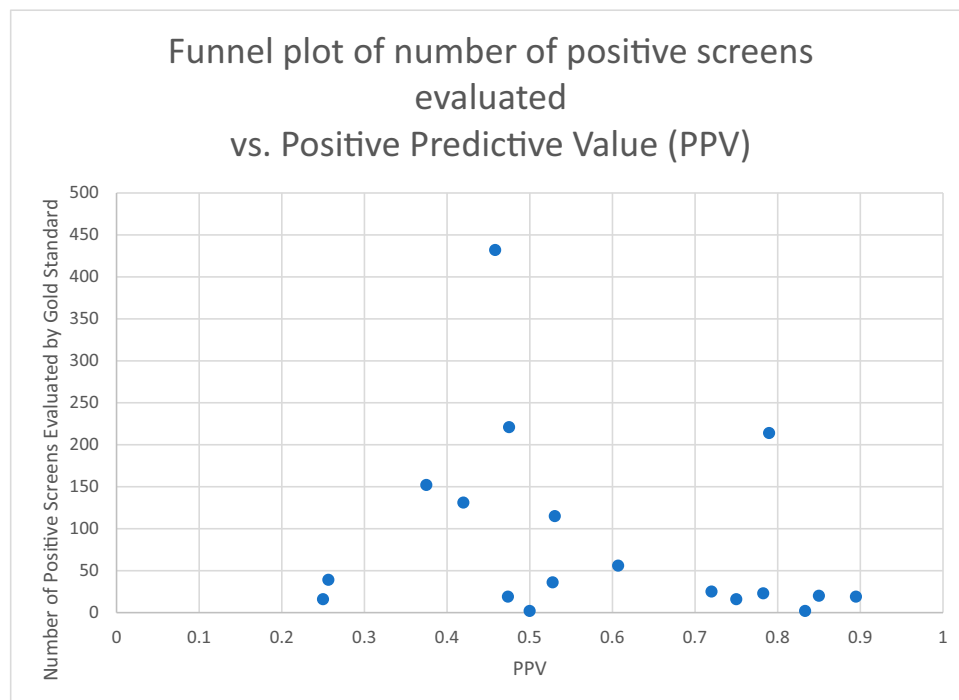

### SUPPLEMENTAL FIGURE 6

Funnel plot to ascertain publication bias.

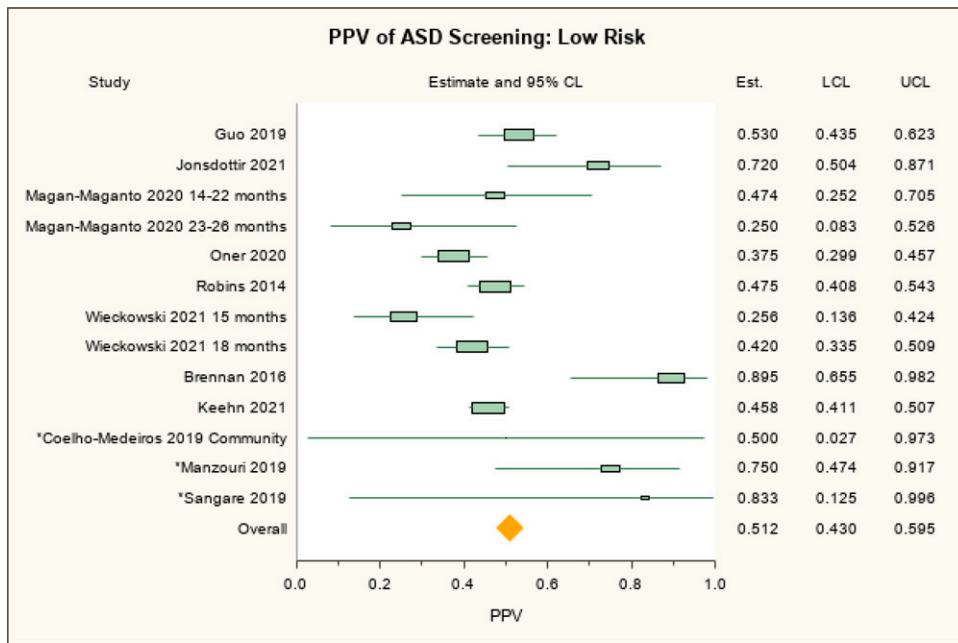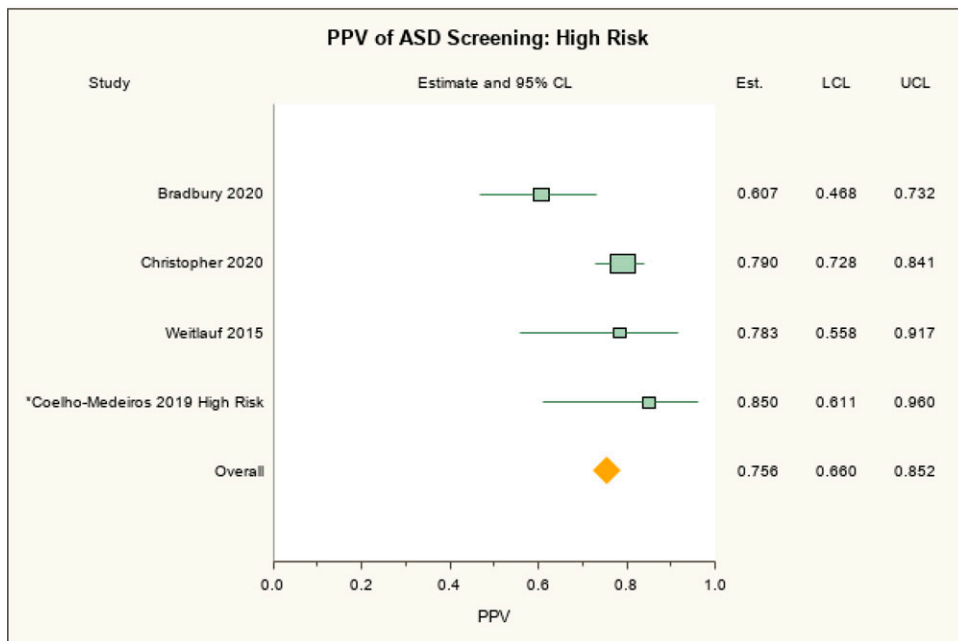

**SUPPLEMENTAL FIGURE 7**

Pooled estimates of positive predictive value of the M-CHAT-R/F questionnaire – stratified based on risk-status of sample. \*Denotes studies rated as “poor” quality.

**SUPPLEMENTAL TABLE 3** Example of a Search Strategy, Ovid MEDLINE Database: Ovid MEDLINE(R) ALL <1946 to November 04, 2021>

| #  | Query                                                                                                                                                                                                                                                                                                                                                                                                                    | Results   |
|----|--------------------------------------------------------------------------------------------------------------------------------------------------------------------------------------------------------------------------------------------------------------------------------------------------------------------------------------------------------------------------------------------------------------------------|-----------|
| 1  | (mass screening or mass screenings or screening or screening, mass or screenings or screenings, mass).mp.                                                                                                                                                                                                                                                                                                                | 675 787   |
| 2  | (checklist or checklists).mp.                                                                                                                                                                                                                                                                                                                                                                                            | 47 915    |
| 3  | (autism spectrum disorder or autism spectrum disorders or autism spectrum disorder or autistic spectrum disorders or disorder, autistic spectrum or (autism or autism, early infantile or autism, infantile or autistic disorder or disorder, autistic or disorders, autistic or early infantile autism or infantile autism or infantile autism, early or kanner syndrome or kanner's syndrome or kanners syndrome)).mp. | 58 069    |
| 4  | (child, preschool or children, preschool or preschool child or preschool children or (infant or infants)).mp.                                                                                                                                                                                                                                                                                                            | 1 748 328 |
| 5  | exp Neuropsychological Tests/                                                                                                                                                                                                                                                                                                                                                                                            | 186 466   |
| 6  | exp Child Development Disorders, Pervasive/                                                                                                                                                                                                                                                                                                                                                                              | 41 114    |
| 7  | 3 or 6                                                                                                                                                                                                                                                                                                                                                                                                                   | 59 575    |
| 8  | m-chat-r.mp.                                                                                                                                                                                                                                                                                                                                                                                                             | 40        |
| 9  | mchat-r.mp. [mp=title, abstract, original title, name of substance word, subject heading word, floating sub-heading word, keyword heading word, organism supplementary concept word, protocol supplementary concept word, rare disease supplementary concept word, unique identifier, synonyms]                                                                                                                          | 6         |
| 10 | Modified Checklist For Autism In Toddler.mp. [mp=title, abstract, original title, name of substance word, subject heading word, floating sub-heading word, keyword heading word, organism supplementary concept word, protocol supplementary concept word, rare disease supplementary concept word, unique identifier, synonyms]                                                                                         | 1         |
| 11 | Modified Checklist For Autism In Toddlers.mp. [mp=title, abstract, original title, name of substance word, subject heading word, floating sub-heading word, keyword heading word, organism supplementary concept word, protocol supplementary concept word, rare disease supplementary concept word, unique identifier, synonyms]                                                                                        | 175       |
| 12 | (mchat or m-chat).mp. [mp=title, abstract, original title, name of substance word, subject heading word, floating sub-heading word, keyword heading word, organism supplementary concept word, protocol supplementary concept word, rare disease supplementary concept word, unique identifier, synonyms]                                                                                                                | 182       |
| 13 | 10 or 11 or 12                                                                                                                                                                                                                                                                                                                                                                                                           | 223       |
| 14 | revised.mp. [mp=title, abstract, original title, name of substance word, subject heading word, floating sub-heading word, keyword heading word, organism supplementary concept word, protocol supplementary concept word, rare disease supplementary concept word, unique identifier, synonyms]                                                                                                                          | 74 734    |
| 15 | 13 and 14                                                                                                                                                                                                                                                                                                                                                                                                                | 51        |
| 16 | 8 or 9 or 15                                                                                                                                                                                                                                                                                                                                                                                                             | 58        |
| 17 | 2 and 4 and 7                                                                                                                                                                                                                                                                                                                                                                                                            | 784       |
| 18 | 1 and 17                                                                                                                                                                                                                                                                                                                                                                                                                 | 235       |
| 19 | 18 not 16                                                                                                                                                                                                                                                                                                                                                                                                                | 197       |
| 20 | 13 and 19                                                                                                                                                                                                                                                                                                                                                                                                                | 95        |
| 21 | 20                                                                                                                                                                                                                                                                                                                                                                                                                       | 95        |
| 22 | limit 21 to yr="2014 -Current"                                                                                                                                                                                                                                                                                                                                                                                           | 53        |
| 23 | 16 or 22                                                                                                                                                                                                                                                                                                                                                                                                                 | 111       |
